# Supplementary material for: Site of metastasis and breast cancer mortality: a Danish nationwide registry-based cohort study
Source: Springer Nature journal article supplement (doi:10.1007/s10585-016-9824-8), 2016-10-07
Supplement: MOESM1 [file 10838678]

| **Supplemental Appendix Table 1. *International Classification of Diseases (ICD)* codes used in the study.** | | |
| --- | --- | --- |
| **Variable** | **ICD-8** | **ICD-10** |
| Breast cancer | N/A | C50 |
| Distant metastases | N/A | C78-C79 |
| - Lung metastasis | N/A | C78.0 |
| - Liver metastasis | N/A | C78.7 |
| - Brain metastasis (including meninges) | N/A | C79.3 |
| - Bone metastasis | N/A | C79.5 |
| Lymph node metastases | N/A | C77 |
| Other primary cancers | N/A | C00-C49; C51-76; C80-C96 |
| *Conditions included in the Charlson Comorbidity Index* |  |  |
| Pulmonary embolism | 450.99 | I26 |
| Deep venous thrombus | 451.00 | I80.1-3 |
| Myocardial infarction | 410 | I21;I22;I23 |
| Congestive heart failure | 427.09; 427.10; 427.11; 427.19; 428.99; 782.49 | I50; I11.0; I13.0; I13.2 |
| Peripheral vascular disease | 440; 441; 442; 443; 444; 445 | I70; I71; I72; I73; I74; I77 |
| Cerebrovascular disease | 430-438 | I60-I69; G45; G46 |
| Dementia | 290.09-290.19; 293.09 | F00-F03; F05.1; G30 |
| Chronic pulmonary disease | 490-493; 515-518 | J40-J47; J60-J67; J68.4; J70.1; J70.3; J84.1; J92.0; J96.1; J98.2; J98.3 |
| Connective tissue disease | 712; 716; 734; 446; 135.99 | M05; M06; M08; M09; M30; M31; M32; M33; M34; M35; M36; D86 |
| Ulcer disease | 530.91; 530.98; 531-534 | K22.1; K25-K28 |
| Mild liver disease | 571; 573.01; 573.04 | B18; K70.0-K70.3; K70.9; K71; K73; K74; K76.0 |
| Diabetes type 1    Diabetes type 2 | 249.00; 249.06; 249.07; 249.09  250.00; 250.06; 250.07; 250.09 | E10.0, E10.1; E10.9  E11.0; E11.1; E11.9 |
| Hemiplegia | 344 | G81; G82 |
| Moderate to severe renal disease | 403; 404; 580-583; 584; 590.09; 593.19; 753.10-753.19; 792 | I12; I13; N00-N05; N07; N11; N14; N17-N19; Q61 |
| Diabetes with end-organ damage | 249.01-249.05; 249.08  250.01-250.05; 250.08 | E10.2-E10.8  E11.2-E11.8 |
| Any tumor (except breast cancer) | 140-194 (except 174) | C00-C75 (except C50) |
| Leukemia | 204-207 | C91-C95 |
| Lymphoma | 200-203; 275.59 | C81-C85; C88; C90; C96 |
| Moderate to severe liver disease | 070.00; 070.02; 070.04; 070.06; 070.08; 573.00; 456.00-456.09 | B15.0; B16.0; B16.2; B19.0; K70.4; K72; K76.6; I85 |
| Metastatic solid tumor | 195-198; 199 | C76-C80 |
| AIDS | 079.83 | B21-B24 |
